# Supplementary material for: Magnetic solid-phase extraction of proteins based on hydroxy functional ionic liquid-modified magnetic nanoparticles
Source: Royal Society of Chemistry journal article supplement (doi:10.1039/c4ay01786b), 2014-01-01
Supplement: c4ay01786b2.pdf [file c4ay01786b2.pdf]

**Table S1**

**(A) <sup>1</sup>H-NMR spectra of the investigated IL**

| <sup>1</sup> H NMR (δ, ×10 <sup>-6</sup> ) <sup>a</sup> |             |             |             |             |             |
|---------------------------------------------------------|-------------|-------------|-------------|-------------|-------------|
| ILs(CDCl <sub>3</sub> ) <sup>b</sup>                    |             |             |             |             |             |
|                                                         | [Simam][Cl] | [Simim][Cl] | [Siemp][Cl] | [Sitmg][Cl] | [SimpY][Cl] |
| 1-H                                                     | 1.23(t, 9H) | 1.22(t, 9H) | 1.22(m, 9H) | 1.23(t, 9H) | 1.23(t, 9H) |
| 2-H                                                     | 3.82(q, 6H) | 3.83(q, 6H) | 3.82(q, 6H) | 3.83(q, 6H) | 3.81(q, 6H) |
| 3-H                                                     | 0.64(t, 2H) | 0.62(t, 2H) | 0.75(t, 2H) | 0.63(t, 2H) | 0.75(t, 2H) |
| 4-H                                                     | 1.84(m, 2H) | 2.01(m, 2H) | 1.89(m, 2H) | 1.84(m, 2H) | 1.86(m, 2H) |
| 5-H                                                     | 3.54(t, 2H) | 4.36(t, 2H) | 3.54(t, 2H) | 3.70(t, 2H) | 3.51(t, 2H) |
| 6-H                                                     | 3.36(s, 6H) | 10.6(s, 1H) | 2.43(t, 2H) | 6.31(s, 2H) | 6.61(s, 1H) |
| 7-H                                                     | 3.72(t,3H)  | 7.37(s, 1H) | 3.81(t, 2H) | -           | 6.12(s, 1H) |
| 8-H                                                     | 4.10(t, 2H) | 7.60(s, 1H) | 1.25(m, 2H) | 3.07(s, 4H) | 3.80(s, 3H) |
| 9-H                                                     | 5.87(s, 1H) | 4.14(s, 1H) | 1.10(t, 3H) | -           | -           |

<sup>a</sup> Note: <sup>1</sup>H-NMR chemical shifts are reported downfield from trimethylsilane (TMS). Multiplicities are abbreviated as s=singlet, d=doublet,

quart =quartet, t=triplet and m= multiplet.

<sup>b</sup>The eight ILs were recorded on Varian-INOVA 400 NMR spectrometry.

**(B) <sup>13</sup>C-NMR spectra of the investigated ILs**

| <sup>13</sup> C NMR (δ, ×10 <sup>-6</sup> ) <sup>a</sup> |             |             |             |             |             |
|----------------------------------------------------------|-------------|-------------|-------------|-------------|-------------|
| ILs(CDCl <sub>3</sub> ) <sup>b</sup>                     |             |             |             |             |             |
|                                                          | [Simam][Cl] | [Simim][Cl] | [Siemp][Cl] | [Sitmg][Cl] | [SimpY][Cl] |
| 1-C                                                      | 6.883       | 7.028       | 7.982       | 7.364       | 8.020       |
| 2-C                                                      | 58.58       | 58.52       | 58.40       | 58.39       | 58.42       |
| 3-C                                                      | 51.82       | 36.49       | 47.45       | 40.36       | 36.04       |
| 4-C                                                      | 18.23       | 24.30       | 18.22       | 18.22       | 18.24       |
| 5-C                                                      | 55.80       | 51.66       | 52.71       | 57.72       | 47.47       |
| 6-C                                                      | 16.66       | 138.1       | 53.27       | -           | 121.61      |
| 7-C                                                      | 65.75       | 121.6       | 66.89       | 161.6       | 108.13      |
| 8-C                                                      | 67.59       | 123.4       | 26.43       | 40.08       | 26.48       |
| 9-C                                                      | -           | 18.20       | 11.58       | -           | -           |

<sup>a</sup> Note: <sup>13</sup>C-NMR chemical shifts are reported downfield from trimethylsilane (TMS).

<sup>b</sup> The eight ILs were recorded on Varian-INOVA 400 NMR spectrometry.
