# Supplementary material for: Magnetic solid-phase extraction of proteins based on hydroxy functional ionic liquid-modified magnetic nanoparticles
Source: Royal Society of Chemistry journal article supplement (doi:10.1039/c4ay01786b), 2014-01-01
Supplement: c4ay01786b3.pdf [file c4ay01786b3.pdf]

**Table S2. The extraction efficiencies of proteins by IL-MNPs based on Nanoparticles (30mg) and Protein solution (0.5mg mL<sup>-1</sup>, 2.0ml and PH=7).**

| IL-MNPs     | Efficiency (%)       |                   |           |
|-------------|----------------------|-------------------|-----------|
|             | Bovine serum albumin | Bovine hemoglobin | Ovalbumin |
| [Simam][Cl] | 47.21                | 23.12             | 28.03     |
| [Simim][Cl] | 40.76                | 21.16             | 26.12     |
| [Siemp][Cl] | 33.15                | 20.16             | 18.22     |
| [Sitmg][Cl] | 18.46                | 10.65             | 12.90     |
| [Simpy][Cl] | 29.15                | 17.88             | 15.64     |

Note: 1. E% was represented the extraction efficiency, which was calculated from equation (1).
