# Supplementary material for: Magnetic solid-phase extraction of proteins based on hydroxy functional ionic liquid-modified magnetic nanoparticles
Source: Royal Society of Chemistry journal article supplement (doi:10.1039/c4ay01786b), 2014-01-01
Supplement: c4ay01786b4.pdf [file c4ay01786b4.pdf]

**Table S3. Single factor experiments**

**(A) Investigated factor 1: the mass of IL-MNPs**

| IL-MNPs<br>(g) | Co<br>(mg mL <sup>-1</sup> ) | Ce<br>(mg mL <sup>-1</sup> ) | V<br>(ml) | t<br>(min) | T<br>(°C) | PH | E%    |
|----------------|------------------------------|------------------------------|-----------|------------|-----------|----|-------|
| 10             | 0.500                        | 0.394                        | 2.00      | 30         | 30        | 7  | 21.15 |
| 20             | 0.500                        | 0.335                        | 2.00      | 30         | 30        | 7  | 32.94 |
| 30             | 0.500                        | 0.264                        | 2.00      | 30         | 30        | 7  | 47.21 |
| 40             | 0.500                        | 0.224                        | 2.00      | 30         | 30        | 7  | 55.27 |
| 50             | 0.500                        | 0.118                        | 2.00      | 30         | 30        | 7  | 76.37 |
| 60             | 0.500                        | 0.093                        | 2.00      | 30         | 30        | 7  | 81.33 |
| 70             | 0.500                        | 0.089                        | 2.00      | 30         | 30        | 7  | 82.26 |

Note: 1. Co and Ce are the initial and equilibrium protein concentrations (in mg mL<sup>-1</sup>), separately.

2. V is the volume of the protein solution (in ml)

3. E% was represented the extraction efficiency, which was calculated from equation (1).

**(B) Investigated factor 2: the concentration of BSA**

| Co (mg/ml) | Ce<br>(mg mL <sup>-1</sup> ) | V<br>(ml) | t<br>(min) | T<br>(°C) | IL-MNPs<br>(g) | PH | E%    |
|------------|------------------------------|-----------|------------|-----------|----------------|----|-------|
| 0.500      | 0.096                        | 2.00      | 30         | 30        | 60             | 7  | 81.33 |
| 0.750      | 0.338                        | 2.00      | 30         | 30        | 60             | 7  | 54.88 |
| 1.000      | 0.593                        | 2.00      | 30         | 30        | 60             | 7  | 40.72 |
| 1.250      | 0.843                        | 2.00      | 30         | 30        | 60             | 7  | 32.60 |
| 1.500      | 1.100                        | 2.00      | 30         | 30        | 60             | 7  | 26.67 |
| 1.750      | 1.342                        | 2.00      | 30         | 30        | 60             | 7  | 23.31 |

Note: 1. Co and Ce are the initial and equilibrium protein concentrations (in mg mL<sup>-1</sup>), separately.

2. V is the volume of the protein solution (in ml)

3. E% was represented the extraction efficiency, which was calculated from equation (1).

**(C) Investigated factor 3: the pH of solution**

| PH   | Ce<br>(mg mL <sup>-1</sup> ) | Co<br>(mg mL <sup>-1</sup> ) | V<br>(ml) | t<br>(min) | T<br>(°C) | IL-MNPs<br>(g) | E%    |
|------|------------------------------|------------------------------|-----------|------------|-----------|----------------|-------|
| 3.00 | 0.252                        | 0.500                        | 2.00      | 30         | 30        | 60             | 49.69 |
| 4.00 | 0.158                        | 0.500                        | 2.00      | 30         | 30        | 60             | 68.30 |
| 5.00 | 0.143                        | 0.500                        | 2.00      | 30         | 30        | 60             | 71.41 |
| 6.00 | 0.065                        | 0.500                        | 2.00      | 30         | 30        | 60             | 86.92 |
| 7.00 | 0.096                        | 0.500                        | 2.00      | 30         | 30        | 60             | 81.33 |
| 8.00 | 0.174                        | 0.500                        | 2.00      | 30         | 30        | 60             | 65.20 |
| 9.00 | 0.283                        | 0.500                        | 2.00      | 30         | 30        | 60             | 43.49 |

Note: 1. Co and Ce are the initial and equilibrium protein concentrations (in  $\text{mg mL}^{-1}$ ), separately.

2. V is the volume of the protein solution (in ml)

3. E% was represented the extraction efficiency, which was calculated from equation (1).

**(D) Investigated factor4: the extraction time**

| t<br>(min) | Ce<br>( $\text{mg mL}^{-1}$ ) | Co<br>( $\text{mg mL}^{-1}$ ) | V<br>(ml) | T<br>( $^{\circ}\text{C}$ ) | IL-MNPs<br>(g) | PH | E%    |
|------------|-------------------------------|-------------------------------|-----------|-----------------------------|----------------|----|-------|
| 5          | 0.283                         | 0.500                         | 2.00      | 30                          | 60             | 6  | 43.49 |
| 10         | 0.174                         | 0.500                         | 2.00      | 30                          | 60             | 6  | 65.20 |
| 15         | 0.096                         | 0.500                         | 2.00      | 30                          | 60             | 6  | 80.71 |
| 20         | 0.069                         | 0.500                         | 2.00      | 30                          | 60             | 6  | 86.92 |
| 25         | 0.067                         | 0.500                         | 2.00      | 30                          | 60             | 6  | 86.61 |
| 30         | 0.065                         | 0.500                         | 2.00      | 30                          | 60             | 6  | 86.92 |
| 35         | 0.067                         | 0.500                         | 2.00      | 30                          | 60             | 6  | 86.61 |

Note: 1. Co and Ce are the initial and equilibrium protein concentrations (in  $\text{mg mL}^{-1}$ ), separately.

2. V is the volume of the protein solution (in ml)

3. E% was represented the extraction efficiency, which was calculated from equation (1).

**(f) Investigated factor 5: the temperature**

| T<br>( $^{\circ}\text{C}$ ) | Ce<br>( $\text{mg mL}^{-1}$ ) | Co<br>( $\text{mg mL}^{-1}$ ) | V<br>(ml) | IL-MNPs<br>(g) | PH | t<br>(min) | E%    |
|-----------------------------|-------------------------------|-------------------------------|-----------|----------------|----|------------|-------|
| 20                          | 0.158                         | 0.500                         | 2.00      | 60             | 6  | 20         | 68.30 |
| 25                          | 0.112                         | 0.500                         | 2.00      | 60             | 6  | 20         | 77.61 |
| 30                          | 0.096                         | 0.500                         | 2.00      | 60             | 6  | 20         | 86.92 |
| 35                          | 0.127                         | 0.500                         | 2.00      | 60             | 6  | 20         | 74.51 |
| 40                          | 0.174                         | 0.500                         | 2.00      | 60             | 6  | 20         | 65.20 |
| 50                          | 0.329                         | 0.500                         | 2.00      | 60             | 6  | 20         | 34.18 |

Note: 1. Co and Ce are the initial and equilibrium protein concentrations (in  $\text{mg mL}^{-1}$ ), separately.

2. V is the volume of the protein solution (in ml)

3. E% was represented the extraction efficiency, which was calculated from equation (1).
