# Supplementary material for: Magnetic solid-phase extraction of proteins based on hydroxy functional ionic liquid-modified magnetic nanoparticles
Source: Royal Society of Chemistry journal article supplement (doi:10.1039/c4ay01786b), 2014-01-01
Supplement: c4ay01786b5.pdf [file c4ay01786b5.pdf]

**Table S4. The results of precision experiment, repeatability experiment and stability experiment.**

| Precision measurement results (n=3)     |       |       |       |
|-----------------------------------------|-------|-------|-------|
| Times number                            | 1     | 2     | 3     |
| Extraction efficiency (%)               | 86.92 | 85.99 | 86.61 |
| RSD (%)                                 | 0.55% |       |       |
| Repeatability measurement results (n=3) |       |       |       |
| Times number                            | 1     | 2     | 3     |
| Extraction efficiency (%)               | 85.68 | 86.61 | 84.13 |
| RSD (%)                                 | 1.47% |       |       |
| Stability measurement results (n=3)     |       |       |       |
| Times number                            | 1     | 2     | 3     |
| Extraction efficiency (%)               | 86.61 | 85.37 | 84.44 |
| RSD (%)                                 | 1.27% |       |       |
