# Supplementary figures and images for: Magnetic solid-phase extraction of proteins based on hydroxy functional ionic liquid-modified magnetic nanoparticles
Source: Royal Society of Chemistry journal article supplement (doi:10.1039/c4ay01786b), 2014-01-01

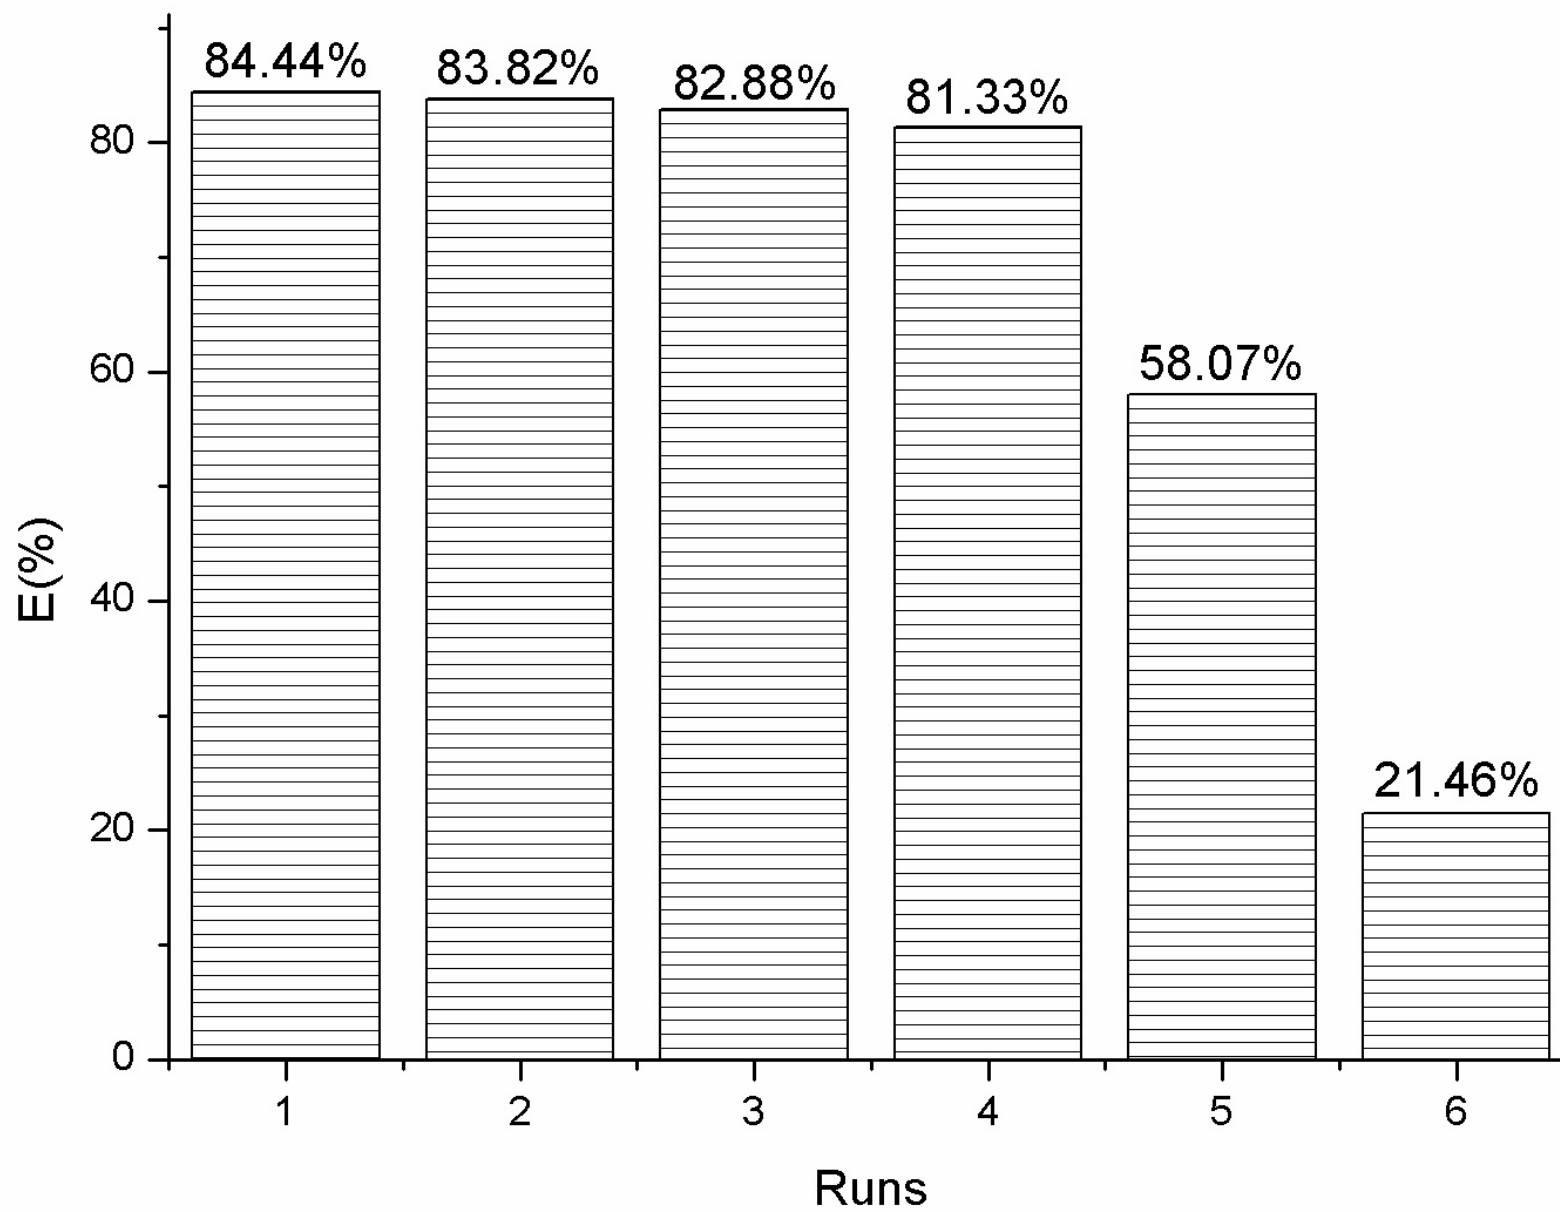

Supplement: c4ay01786b1.pdf [file c4ay01786b1.pdf]
